# Supplementary material for: Impact of HDL genetic risk scores on coronary artery calcified plaque and mortality in individuals with type 2 diabetes from the Diabetes Heart Study
Source: PubMed Central journal article supplement (PMC3695806; doi:10.1186/1475-2840-12-95), 2013-06-25
Supplement: 1475-2840-12-95-S1.pdf [file 1475-2840-12-95-S1.pdf]

**Additional file 1:** Associations between HDL genetic risk scores and HDL, LDL, triglycerides, and coronary artery calcified plaque (CAC), with and without adjustment for diabetic medication use.

|                      | <b>Model 1</b>         |                         | <b>Model 2</b>         |                         |
|----------------------|------------------------|-------------------------|------------------------|-------------------------|
|                      | <b>β Estimate (CI)</b> | <b>p-value</b>          | <b>β Estimate (CI)</b> | <b>p-value</b>          |
| <b>HDL</b>           |                        |                         |                        |                         |
| Risk Score 1a        | 0.033 (0.007- 0.058)   | 0.013                   | 0.034 (0.008- 0.059)   | 0.009                   |
| Risk Score 1b        | 0.035 (0.008- 0.063)   | 0.012                   | 0.036 (0.009- 0.063)   | 0.010                   |
| Risk Score 2a        | 0.052 (0.024- 0.080)   | 3.06 x 10 <sup>-4</sup> | 0.051 (0.023- 0.079)   | 4.00 x 10 <sup>-4</sup> |
| Risk Score 2b        | 0.063 (0.037- 0.088)   | 1.44 x 10 <sup>-6</sup> | 0.062 (0.036- 0.088)   | 2.14 x 10 <sup>-6</sup> |
| Combined Unweighted  | 0.040 (0.021- 0.058)   | 2.34 x 10 <sup>-5</sup> | 0.040 (0.022- 0.059)   | 1.49 x 10 <sup>-5</sup> |
| Combined Weighted    | 0.044 (0.027- 0.061)   | 2.75 x 10 <sup>-7</sup> | 0.044 (0.027- 0.061)   | 3.40 x 10 <sup>-7</sup> |
| <b>LDL</b>           |                        |                         |                        |                         |
| Risk Score 1a        | 0.245 (-0.759- 1.248)  | 0.633                   | 0.301 (-0.695- 1.297)  | 0.554                   |
| Risk Score 1b        | 0.140 (-0.887- 1.167)  | 0.789                   | 0.166 (-0.850- 1.181)  | 0.749                   |
| Risk Score 2a        | -0.805 (-1.955- 0.346) | 0.170                   | -0.841 (-1.977- 0.296) | 0.147                   |
| Risk Score 2b        | -0.585 (-1.698- 0.529) | 0.303                   | -0.612 (-1.719- 0.495) | 0.279                   |
| Combined Unweighted  | -0.266 (-1.038- 0.507) | 0.501                   | -0.238 (-1.007- 0.531) | 0.545                   |
| Combined Weighted    | -0.327 (-1.060- 0.406) | 0.381                   | -0.334 (-1.063- 0.395) | 0.369                   |
| <b>Triglycerides</b> |                        |                         |                        |                         |

|                     |                        |       |                        |       |
|---------------------|------------------------|-------|------------------------|-------|
| Risk Score 1a       | -0.006 (-0.022- 0.010) | 0.469 | -0.007 (-0.023- 0.010) | 0.432 |
| Risk Score 1b       | -0.008 (-0.024- 0.009) | 0.374 | -0.008 (-0.024- 0.009) | 0.357 |
| Risk Score 2a       | -0.015 (-0.036- 0.005) | 0.133 | -0.016 (-0.036- 0.005) | 0.132 |
| Risk Score 2b       | -0.013 (-0.031- 0.005) | 0.163 | -0.013 (-0.031- 0.005) | 0.158 |
| Combined Unweighted | -0.012 (-0.025- 0.001) | 0.072 | -0.012 (-0.025- 0.001) | 0.063 |
| Combined Weighted   | -0.010 (-0.022- 0.002) | 0.096 | -0.010 (-0.022- 0.002) | 0.090 |

---

**Coronary Artery  
Calcified Plaque**

|                     |                         |                         |                         |                         |
|---------------------|-------------------------|-------------------------|-------------------------|-------------------------|
| Risk Score 1a       | -0.068 (-0.128- -0.008) | 0.027                   | -0.066 (-0.127- -0.006) | 0.032                   |
| Risk Score 1b       | -0.059 (-0.123- 0.004)  | 0.065                   | -0.058 (-0.122- 0.005)  | 0.071                   |
| Risk Score 2a       | -0.082 (-0.149- -0.014) | 0.017                   | -0.080 (-0.147- -0.013) | 0.019                   |
| Risk Score 2b       | -0.101 (-0.163- -0.038) | 0.002                   | -0.099 (-0.162- -0.037) | 0.002                   |
| Combined Unweighted | -0.080 (-0.124- -0.037) | 3.18 x 10 <sup>-4</sup> | -0.079 (-0.123- -0.035) | 4.32 x 10 <sup>-4</sup> |
| Combined Weighted   | -0.075 (-0.117- -0.034) | 3.85 x 10 <sup>-4</sup> | -0.074 (-0.115- -0.032) | 4.83 x 10 <sup>-4</sup> |

Analysis was performed using marginal models with generalized estimating equations. Model 1 is adjusted for age, sex, body mass index (BMI), smoking, hypertension, and prior cardiovascular disease; Model 2 is adjusted for age, sex, BMI, smoking, hypertension, prior cardiovascular disease, oral T2D medication use, and insulin use. Associations are reported as the  $\beta$  estimate and its 95% confidence interval (CI).
