# Supplementary material for: Impact of HDL genetic risk scores on coronary artery calcified plaque and mortality in individuals with type 2 diabetes from the Diabetes Heart Study
Source: PubMed Central journal article supplement (PMC3695806; doi:10.1186/1475-2840-12-95), 2013-06-25
Supplement: 1475-2840-12-95-S2.pdf [file 1475-2840-12-95-S2.pdf]

**Additional file 2:** Association between HDL genetic risk scores analyzed as a continuous variable and all-cause and CVD-mortality, with and without adjustment for diabetic medication use.

|                            | <b>Model 1</b>    |                | <b>Model 2</b>    |                |
|----------------------------|-------------------|----------------|-------------------|----------------|
| <b>All-cause Mortality</b> | <b>HR (CI)</b>    | <b>p-value</b> | <b>HR (CI)</b>    | <b>p-value</b> |
| Risk Score 1a              | 0.97 (0.92, 1.03) | 0.295          | 0.97 (0.92, 1.03) | 0.332          |
| Risk Score 1b              | 0.97 (0.92, 1.02) | 0.228          | 0.97 (0.92, 1.02) | 0.259          |
| Risk Score 2a              | 0.96 (0.90, 1.03) | 0.232          | 0.96 (0.91, 1.03) | 0.243          |
| Risk Score 2b              | 0.93 (0.88, 0.98) | 0.011          | 0.93 (0.88, 0.99) | 0.014          |
| Combined Unweighted        | 0.97 (0.93- 1.01) | 0.162          | 0.97 (0.93- 1.01) | 0.185          |
| Combined Weighted          | 0.95 (0.92- 0.99) | 0.011          | 0.96 (0.92- 0.99) | 0.016          |
| <b>CVD Mortality</b>       |                   |                |                   |                |
| Risk Score 1a              | 1.00 (0.92, 1.09) | 0.988          | 1.01 (0.92, 1.10) | 0.913          |
| Risk Score 1b              | 0.99 (0.91, 1.08) | 0.835          | 1.00 (0.92, 1.08) | 0.903          |
| Risk Score 2a              | 1.02 (0.94, 1.12) | 0.622          | 1.03 (0.94, 1.12) | 0.557          |
| Risk Score 2b              | 0.97 (0.90, 1.05) | 0.477          | 0.97 (0.90, 1.06) | 0.519          |
| Combined Unweighted        | 1.00 (0.94- 1.07) | 0.890          | 1.01 (0.95- 1.07) | 0.801          |
| Combined Weighted          | 0.98 (0.93- 1.04) | 0.502          | 0.98 (0.93- 1.04) | 0.560          |

Analysis was performed using Cox proportional hazards regression. Model 1 is adjusted for age, sex, body mass index (BMI), smoking, hypertension, cholesterol medication use, and prior cardiovascular disease; Model 2 is adjusted for age, sex, BMI, smoking, hypertension,

cholesterol medication use, prior cardiovascular disease, oral T2D medication use, and insulin use. The hazard ratio (HR) and its 95% confidence interval (CI) are reported.
