# Supplementary material for: Impact of HDL genetic risk scores on coronary artery calcified plaque and mortality in individuals with type 2 diabetes from the Diabetes Heart Study
Source: PubMed Central journal article supplement (PMC3695806; doi:10.1186/1475-2840-12-95), 2013-06-25
Supplement: 1475-2840-12-95-S3.pdf [file 1475-2840-12-95-S3.pdf]

**Additional file 3:** Association between HDL genetic risk score tertiles and all-cause and CVD- mortality using unadjusted proportional hazards regression models and between risk scores and HDL levels using unadjusted marginal models incorporating generalized estimating equations. Hazard ratios (HR) or  $\beta$  estimates (as appropriate) and 95% confidence intervals (CI) are reported relative to the lowest tertile.

|                      | <b>HDL</b>      |                       |                                             |                       | <b>All-cause mortality</b> |                | <b>CVD mortality</b> |                |
|----------------------|-----------------|-----------------------|---------------------------------------------|-----------------------|----------------------------|----------------|----------------------|----------------|
|                      | <b>Tertiles</b> | <b>Tertile Ranges</b> | <b><math>\beta</math> Estimate (95% CI)</b> | <b>p-value</b>        | <b>HR (95% CI)</b>         | <b>p-value</b> | <b>HR (95% CI)</b>   | <b>p-value</b> |
| <b>Risk Score 1a</b> | T1              | $\leq 13$             | 0                                           |                       | 1                          |                | 1                    |                |
|                      | T2              | 14-15                 | -0.012 (-0.153,0.129)                       | 0.869                 | 1.06 (0.77, 1.47)          | 0.719          | 1.21 (0.73, 2.01)    | 0.451          |
|                      | T3              | $\geq 16$             | 0.178 (0.027, 0.328)                        | 0.021                 | 0.98 (0.70, 1.38)          | 0.908          | 1.29 (0.76, 2.20)    | 0.350          |
| <b>Risk Score 1b</b> | T1              | $\leq 12$             | 0                                           |                       | 1                          |                | 1                    |                |
|                      | T2              | 13-14                 | -0.034 (-0.167, 0.100)                      | 0.622                 | 1.12 (0.83, 1.52)          | 0.449          | 1.29 (0.83, 2.01)    | 0.261          |
|                      | T3              | $\geq 15$             | 0.171 (0.021, 0.321)                        | 0.025                 | 0.95 (0.68, 1.33)          | 0.761          | 1.20 (0.72, 2.00)    | 0.490          |
| <b>Risk Score 2a</b> | T1              | $\leq 12$             | 0                                           |                       | 1                          |                | 1                    |                |
|                      | T2              | 13-14                 | 0.083 (-0.047, 0.213)                       | 0.210                 | 0.81 (0.59, 1.10)          | 0.172          | 0.86 (0.55, 1.36)    | 0.529          |
|                      | T3              | $\geq 15$             | 0.213 (0.061, 0.366)                        | 0.006                 | 0.84 (0.60, 1.17)          | 0.295          | 1.08 (0.68, 1.72)    | 0.740          |
| <b>Risk Score 2b</b> | T1              | $\leq 10$             | 0                                           |                       | 1                          |                | 1                    |                |
|                      | T2              | 11-12                 | 0.129 (0.003, 0.254)                        | 0.045                 | 0.74 (0.56, 0.98)          | 0.038          | 0.81 (0.55, 1.20)    | 0.292          |
|                      | T3              | $\geq 13$             | 0.319 (0.166, 0.471)                        | $4.31 \times 10^{-5}$ | 0.57 (0.39, 0.83)          | 0.003          | 0.72 (0.43, 1.19)    | 0.199          |
